# Supplementary material for: Estimated Prevalence and Testing for Albuminuria in US Adults at Risk for Chronic Kidney Disease
Source: PubMed Central journal article supplement — JAMA Netw Open. 2023 Jul 27;6(7):e2326230. doi: 10.1001/jamanetworkopen.2023.26230 (PMC10375308; doi:10.1001/jamanetworkopen.2023.26230), 2023-07-27
Supplement: jamanetwopen-e2326230-s001.pdf [file jamanetwopen-e2326230-s001.pdf]

## Supplemental Online Content

Chu CD, Xia F, Du Y, et al. Estimated prevalence and testing for albuminuria in US adults at risk for chronic kidney disease. *JAMA Netw Open*. 2023;6(7):e2326230. doi:10.1001/jamanetworkopen.2023.26230

**eTable 1.** Diagnosis Code List for Variable Definition

**eTable 2.** Characteristics of Included and Excluded Optum® EHR Study Population

**eTable 3.** Study Population Characteristics of Optum® EHR Patients by Diabetes Status

**eTable 4.** Population Characteristics of NHANES Participants with Hypertension or Diabetes, 2007-2018

**eTable 5.** Albuminuria Prevalence, Testing Rates, and Detection Rates

**eTable 6.** Albuminuria Prevalence, Testing, and Detection by Diabetes Status

**eTable 7.** Baseline Characteristics for Secondary Analysis Including Optum® EHR Patients Having  $\geq 1$  Year Follow-Up

**eTable 8.** Albuminuria Prevalence, Testing, and Detection, Using Optum® EHR-Derived Prediction Model

**eFigure 1.** Consort Diagram – Optum® EHR Study Population

**eFigure 2.** Consort Diagram – NHANES Study Population

**eFigure 3.** Calibration Plots for Albuminuria Prediction Model

**eFigure 4.** Estimated Albuminuria Prevalence and Proportion Detected by Diabetes Status (Optum® EHR; N = 192,108)

**eFigure 5.** Calibration Plot for Optum® Electronic Health Record Derived Albuminuria Prediction Model

This supplemental material has been provided by the authors to give readers additional information about their work.

**eTable 1. Diagnosis Code List for Variable Definition**

| <b>Condition</b>                                                      | <b>Codes</b>                                                                                                                                                                                      |
|-----------------------------------------------------------------------|---------------------------------------------------------------------------------------------------------------------------------------------------------------------------------------------------|
| End-Stage Kidney Disease<br>(includes dialysis and kidney transplant) | CPT-4: 90935, 90937, 90945, 90947, 99512<br>ICD-10: I12.0, I13.11, I13.2, N18.5, N18.6, Z49x,<br>Z91.15, Z94.0, Z99.2, T86.1x<br>ICD-10-PCS: 0TYx, 3E1M39Z, 5A1D60Z, 5A1D70Z,<br>5A1D80Z, 5A1D90Z |
| Diabetes Type 1                                                       | ICD-10: E10x                                                                                                                                                                                      |
| Diabetes Type 2                                                       | ICD-10: E11x                                                                                                                                                                                      |
| Diabetes (unspecified type)                                           | ICD-10: E08x, E09x, E13x                                                                                                                                                                          |
| Hypertension                                                          | ICD-10: I10.x, I11.x, I12.x, I13.x, I15.x, I16.x                                                                                                                                                  |
| Coronary Heart Disease                                                | ICD-10: I21.x, I22.x, I23.x, I25.x                                                                                                                                                                |
| Heart Failure                                                         | ICD-10: I09.81, I11.0, I13.0, I13.2, I50                                                                                                                                                          |
| Cerebrovascular Disease                                               | ICD-10: I60.x, I61.x, I62.x, I63.x                                                                                                                                                                |

Abbreviations: CPT = Current Procedural Terminology, ICD = International Classification of Disease.

**eTable 2. Characteristics of Included and Excluded Optum® EHR Study Population**

| Characteristic            | Included       | Excluded      |
|---------------------------|----------------|---------------|
| N                         | 192,108        | 103,089       |
| Age, years                | 60.3 ±15.1     | 58.3 ± 16.5   |
| Sex                       |                |               |
| Female                    | 105,591 (55.0) | 56,676 (55.0) |
| Male                      | 86,517 (45.0)  | 46,299 (44.9) |
| Race and Ethnicity        |                |               |
| Black                     | 21,001 (10.9)  | 10,375 (10.1) |
| Hispanic                  | 8,153 (4.2)    | 4,636 (4.5)   |
| White                     | 152,655 (79.5) | 80,511 (78.1) |
| Other <sup>1</sup>        | 10,299 (5.4)   | 7,567 (7.3)   |
| Insurance                 |                |               |
| Commercial                | 112,370 (58.5) | 63,312 (61.4) |
| Medicaid                  | 12,925 (6.7)   | 6,972 (6.8)   |
| Medicare                  | 58,307 (30.4)  | 24,126 (23.4) |
| Uninsured                 | 3,856 (2.0)    | 2,675 (2.6)   |
| Other/Unknown             | 4,650 (2.4)    | 6,004 (5.8)   |
| Current smoker            | 22,443 (11.7)  | 9,410 (9.1)   |
| Systolic BP, mm Hg        | 131 ± 13       | 131 ± 15      |
| Diastolic BP, mm Hg       | 77 ± 8         | 78 ± 10       |
| Heart failure             | 13,307 (6.9)   | 5,303 (5.1)   |
| Coronary artery disease   | 28,010 (14.6)  | 12,730 (12.3) |
| Hypertension only         | 141,601 (73.7) | 88,723 (86.1) |
| Diabetes only             | 6,519 (3.4)    | 3,057 (3.0)   |
| Hypertension and diabetes | 43,988 (22.9)  | 11,309 (11.0) |

Note: Results presented as mean ± standard deviation or n (%). All comparisons are statistically significant to p <0.01 except sex (p=0.70).

<sup>1</sup>Other includes American Indian or Alaska Native, Asian, Native Hawaiian or Other Pacific Islander.

Abbreviations: BP = diastolic blood pressure; DM = diabetes mellitus; eGFR = estimated glomerular filtration rate; EHR = electronic health record; HTN = hypertension.

**eTable 3. Study Population Characteristics of Optum® EHR Patients by Diabetes Status**

| <b>Characteristic</b>                    | <b>Diabetes</b> | <b>No Diabetes</b> |
|------------------------------------------|-----------------|--------------------|
| N                                        | 50,507          | 141,601            |
| Age, years                               | 61.3 ± 13.7     | 59.9 ± 15.5        |
| Sex                                      |                 |                    |
| Female                                   | 25,166 (49.8)   | 80,425 (56.8)      |
| Male                                     | 25,341 (50.2)   | 61,176 (43.2)      |
| Race and Ethnicity                       |                 |                    |
| Black                                    | 6,767 (13.4)    | 14,234 (10.1)      |
| Hispanic                                 | 3,257 (6.5)     | 4,896 (3.5)        |
| White                                    | 37,346 (73.9)   | 115,309 (81.4)     |
| Other <sup>1</sup>                       | 3,137 (6.2)     | 7,162 (5.1)        |
| Insurance                                |                 |                    |
| Commercial                               | 27,764 (55.0)   | 84,606 (59.8)      |
| Medicaid                                 | 3,835 (7.6)     | 9,090 (6.4)        |
| Medicare                                 | 16,669 (33.0)   | 41,368 (29.4)      |
| Uninsured                                | 1,347 (2.7)     | 2,509 (1.8)        |
| Other/Unknown                            | 892 (1.8)       | 3,758 (2.7)        |
| Current smoker                           | 5,868 (11.6)    | 16,575 (11.7)      |
| eGFR, ml/min/1.73m <sup>2</sup>          | 82 ± 23         | 84 ± 21            |
| eGFR Category, ml/min/1.73m <sup>2</sup> |                 |                    |
| ≥60                                      | 40,745 (80.1)   | 122,861 (86.8)     |
| 45-59                                    | 5,893 (11.7)    | 12,816 (9.1)       |
| 30-44                                    | 3,141 (6.2)     | 4,851 (3.4)        |
| <30                                      | 728 (1.4)       | 1,073 (0.8)        |
| Systolic BP, mm Hg                       | 131 ± 13        | 131 ± 13           |
| Diastolic BP, mm Hg                      | 75 ± 8          | 77 ± 9             |
| Heart failure                            | 4,814 (9.5)     | 8,493 (6.0)        |
| Coronary artery disease                  | 9,585 (19.0)    | 18,425 (13.0)      |
| Albuminuria testing                      | 26,410 (52.3)   | 7,219 (5.1)        |

Data are presented as mean ± standard deviation or n (%).

<sup>1</sup>Other includes American Indian or Alaska Native, Asian, Native Hawaiian or Other Pacific Islander.

Abbreviations: BP = blood pressure; eGFR = estimated glomerular filtration rate; EHR = electronic health record; NHANES = National Health And Nutrition Examination Survey

**eTable 4. Population Characteristics of NHANES Participants with Hypertension or Diabetes, 2007-2018**

| <b>Characteristic</b>           | <b>Unweighted</b> | <b>Weighted</b>   |
|---------------------------------|-------------------|-------------------|
| N                               | 13,410            | 82,239,546        |
| Age, years                      | 60.0 ± 14.9       | 57.9 ± 14.9       |
| Female                          | 6,836 (51.0)      | 42,158,912 (51.3) |
| Race/Ethnicity                  |                   |                   |
| Black                           | 3,248 (24.2)      | 10,135,824 (12.3) |
| Hispanic                        | 2,932 (21.9)      | 8,604,052 (10.5)  |
| White                           | 5,878 (43.8)      | 57,585,531 (70.0) |
| Other <sup>1</sup>              | 1,352 (10.1)      | 5,914,049 (7.2)   |
| Insurance                       |                   |                   |
| Commercial                      | 4,355 (32.5)      | 35,287,814 (43.0) |
| Medicaid                        | 1,068 (8.0)       | 4,970,063 (6.1)   |
| Medicare                        | 5,511 (41.1)      | 29,233,870 (35.6) |
| Uninsured                       | 1,532 (11.4)      | 7,349,484 (9.0)   |
| Other/Unknown                   | 944 (7.0)         | 5,321,324 (6.5)   |
| eGFR, ml/min/1.73m <sup>2</sup> | 85 ± 23           | 87 ± 22           |
| Systolic BP, mm Hg              | 133 ± 20          | 131 ± 19          |
| Diastolic BP, mm Hg             | 71 ± 15           | 72 ± 14           |
| Heart failure                   | 854 (6.4)         | 4,295,330 (5.2)   |
| Coronary artery disease         | 1,104 (8.2)       | 6,351,763 (7.7)   |
| Hypertension only               | 8,725 (65.1)      | 58,146,831 (70.7) |
| Diabetes only                   | 841 (6.3)         | 4,751,037 (5.8)   |
| Hypertension and diabetes       | 3,844 (28.7)      | 19,341,588 (23.5) |

<sup>1</sup>Other includes American Indian or Alaska Native, Asian, Native Hawaiian or Other Pacific Islander.

Data are presented as mean ± standard deviation or n (%). Weighted figures are accounting for complex survey design used by NHANES to obtain nationally representative estimates.

Abbreviations: BP = blood pressure; eGFR = estimated glomerular filtration rate; NHANES = National Health And Nutrition Examination Survey.

**eTable 5. Albuminuria Prevalence, Testing Rates, and Detection Rates**

| Stratum                                | N       | N tested (%)  | Tested, observed albuminuria | Untested, predicted albuminuria | Albuminuria prevalence in stratum (%) | Albuminuria detection rate (%) |
|----------------------------------------|---------|---------------|------------------------------|---------------------------------|---------------------------------------|--------------------------------|
| <b>Overall</b>                         | 192,108 | 33,629 (17.5) | 11,525                       | 21,231                          | 17.1                                  | 35.2                           |
| <b>Sex</b>                             |         |               |                              |                                 |                                       |                                |
| Male                                   | 86,517  | 16,683 (19.3) | 6,045                        | 10,039                          | 18.6                                  | 37.6                           |
| Female                                 | 105,591 | 16,946 (16.0) | 5,480                        | 11,192                          | 15.8                                  | 32.9                           |
| <b>Age (years)</b>                     |         |               |                              |                                 |                                       |                                |
| 18-49                                  | 43,583  | 6,042 (13.9)  | 1,780                        | 3,368                           | 11.8                                  | 34.6                           |
| 50-64                                  | 69,262  | 12,700 (18.3) | 3,843                        | 6,063                           | 14.3                                  | 38.8                           |
| 65-74                                  | 42,941  | 8,659 (20.2)  | 3,054                        | 4,903                           | 18.5                                  | 38.4                           |
| 75+                                    | 36,322  | 6,228 (17.1)  | 2,848                        | 6,895                           | 26.8                                  | 29.2                           |
| <b>Race and Ethnicity</b>              |         |               |                              |                                 |                                       |                                |
| Black                                  | 21,001  | 4,644 (22.1)  | 1,573                        | 2,607                           | 19.9                                  | 37.6                           |
| Hispanic                               | 8,153   | 2,100 (25.8)  | 765                          | 951                             | 21.0                                  | 44.6                           |
| White                                  | 152,655 | 24,801 (16.2) | 8,407                        | 16,373                          | 16.2                                  | 33.9                           |
| Other                                  | 10,299  | 2,084 (20.2)  | 780                          | 1,299                           | 20.2                                  | 37.5                           |
| <b>DM only</b>                         | 6,519   | 3,070 (47.1)  | 562                          | 655                             | 18.7                                  | 46.2                           |
| <b>HTN only</b>                        | 141,601 | 7,219 (5.1)   | 1,742                        | 14,939                          | 11.8                                  | 10.4                           |
| <b>DM + HTN</b>                        | 43,988  | 23,340 (53.1) | 9,221                        | 5,637                           | 33.8                                  | 62.1                           |
| <b>All DM</b>                          | 50,507  | 26,410 (52.3) | 9,783                        | 6,292                           | 31.8                                  | 60.9                           |
| <b>All HTN</b>                         | 185,589 | 30,559 (16.5) | 10,963                       | 20,576                          | 17.0                                  | 34.8                           |
| <b>eGFR (ml/min/1.73m<sup>2</sup>)</b> |         |               |                              |                                 |                                       |                                |
| eGFR 60+                               | 163,606 | 27,283 (16.7) | 8,143                        | 14,604                          | 13.9                                  | 35.8                           |
| eGFR 45-59                             | 18,709  | 3,982 (21.3)  | 1,844                        | 3,527                           | 28.7                                  | 34.3                           |
| eGFR 30-44                             | 7,992   | 1,939 (24.3)  | 1,192                        | 2,363                           | 44.5                                  | 33.5                           |
| eGFR <30                               | 1,801   | 425 (23.6)    | 346                          | 733                             | 59.9                                  | 32.1                           |

Albuminuria prevalence within each stratum was computed as  $([n \text{ tested, observed albuminuria}] + [n \text{ untested, predicted albuminuria}]) / (N \text{ within stratum})$ . Albuminuria detection rate is the percent of all albuminuria within a stratum that has detected by UACR testing. Abbreviations: DM = diabetes mellitus; eGFR = estimated glomerular filtration rate; HTN = hypertension; UACR = urine albumin/creatinine ratio.

**eTable 6. Albuminuria Prevalence, Testing, and Detection by Diabetes Status**

| Stratum            | N       | N tested (%)  | Tested, observed albuminuria | Untested, predicted albuminuria | Albuminuria prevalence in stratum (%) | Albuminuria detection rate (%) |
|--------------------|---------|---------------|------------------------------|---------------------------------|---------------------------------------|--------------------------------|
| <b>Diabetes</b>    |         |               |                              |                                 |                                       |                                |
| Male               | 25,341  | 13,453 (53.1) | 5,230                        | 3,206                           | 33.3                                  | 62.0                           |
| Female             | 25,166  | 12,957 (51.5) | 4,553                        | 3,086                           | 30.4                                  | 59.6                           |
| Age 18-49          | 9,471   | 4,796 (50.6)  | 1,556                        | 874                             | 25.7                                  | 64.0                           |
| Age 50-64          | 19,279  | 10,231 (53.1) | 3,376                        | 1,935                           | 27.5                                  | 63.6                           |
| Age 65-74          | 12,726  | 6,833 (53.7)  | 2,629                        | 1,651                           | 33.6                                  | 61.4                           |
| Age 75+            | 9,031   | 4,550 (50.4)  | 2,222                        | 1,831                           | 44.9                                  | 54.8                           |
| Black              | 6,767   | 3,553 (52.5)  | 1,281                        | 941                             | 32.8                                  | 57.7                           |
| Hispanic           | 3,257   | 1,779 (54.6)  | 690                          | 406                             | 33.7                                  | 63.0                           |
| Other              | 3,137   | 1,656 (52.8)  | 662                          | 425                             | 34.7                                  | 60.9                           |
| White              | 37,346  | 19,422 (52.0) | 7,150                        | 4,519                           | 31.2                                  | 61.3                           |
| eGFR 60+           | 40,745  | 21,583 (53)   | 7,064                        | 3,981                           | 27.1                                  | 64.0                           |
| eGFR 45-59         | 5,893   | 3,055 (51.8)  | 1,526                        | 1,104                           | 44.6                                  | 58.0                           |
| eGFR 30-44         | 3,141   | 1,484 (47.2)  | 955                          | 904                             | 59.2                                  | 51.4                           |
| eGFR <30           | 728     | 288 (39.6)    | 238                          | 301                             | 74.0                                  | 44.2                           |
| <b>No Diabetes</b> |         |               |                              |                                 |                                       |                                |
| Male               | 61,176  | 3,230 (5.3)   | 815                          | 6,832                           | 12.5                                  | 10.7                           |
| Female             | 80,425  | 3,989 (5)     | 927                          | 8,106                           | 11.2                                  | 10.3                           |
| Age 18-49          | 34,112  | 1,246 (3.7)   | 224                          | 2,494                           | 8.0                                   | 8.2                            |
| Age 50-64          | 49,983  | 2,469 (4.9)   | 467                          | 4,128                           | 9.2                                   | 10.2                           |
| Age 65-74          | 30,215  | 1,826 (6)     | 425                          | 3,252                           | 12.2                                  | 11.6                           |
| Age 75+            | 27,291  | 1,678 (6.1)   | 626                          | 5,064                           | 20.8                                  | 11.0                           |
| Black              | 14,234  | 1,091 (7.7)   | 292                          | 1,665                           | 13.7                                  | 14.9                           |
| Hispanic           | 4,896   | 321 (6.6)     | 75                           | 545                             | 12.7                                  | 12.1                           |
| Other              | 7,162   | 428 (6.0)     | 118                          | 873                             | 13.8                                  | 11.9                           |
| White              | 115,309 | 5,379 (4.7)   | 1,257                        | 11,854                          | 11.4                                  | 9.6                            |
| eGFR 60+           | 122,861 | 5,700 (4.6)   | 1,079                        | 10,623                          | 9.5                                   | 9.2                            |
| eGFR 45-59         | 12,816  | 927 (7.2)     | 318                          | 2,423                           | 21.4                                  | 11.6                           |
| eGFR 30-44         | 4,851   | 455 (9.4)     | 237                          | 1,459                           | 35.0                                  | 14.0                           |
| eGFR <30           | 1,073   | 137 (12.8)    | 108                          | 432                             | 50.3                                  | 20.0                           |

Albuminuria prevalence within each stratum was computed as  $([n \text{ tested, observed albuminuria}] + [n \text{ untested, predicted albuminuria}]) / (N \text{ within stratum})$ . Albuminuria detection rate is the percent of all albuminuria within a stratum that has detected by UACR testing.

Abbreviations: eGFR = estimated glomerular filtration rate; UACR = urine albumin/creatinine ratio.

**eTable 7. Baseline Characteristics for Secondary Analysis including Optum® EHR Patients having ≥1 Year Follow Up**

| Characteristic                  | Overall        | UACR tested   | UACR untested  |
|---------------------------------|----------------|---------------|----------------|
| N                               | 149,554        | 27,548        | 122,006        |
| Female                          | 83,403 (55.8)  | 13,982 (50.8) | 69,421 (56.9)  |
| Age, years                      | 59.9 ± 14.9    | 61.7 ± 13.4   | 59.5 ± 15.2    |
| Race and Ethnicity              |                |               |                |
| Black                           | 16,314 (10.9)  | 3,905 (14.2)  | 12,409 (10.2)  |
| Hispanic                        | 6,123 (4.1)    | 1,616 (5.9)   | 4,507 (3.7)    |
| White                           | 119,608 (80.0) | 20,399 (74.1) | 99,209 (81.3)  |
| Other <sup>1</sup>              | 7,509 (5.0)    | 1,628 (5.9)   | 5,881 (4.8)    |
| Insurance,                      |                |               |                |
| Commercial                      | 90,732 (60.7)  | 15,610 (56.7) | 75,122 (61.6)  |
| Medicaid                        | 10,090 (6.8)   | 1,736 (6.3)   | 8,354 (6.9)    |
| Medicare                        | 42,457 (28.4)  | 9,081 (33.0)  | 33,376 (27.4)  |
| Other                           | 1,856 (1.2)    | 259 (0.9)     | 1,597 (1.3)    |
| Uninsured                       | 2,573 (1.7)    | 527 (1.9)     | 2,046 (1.7)    |
| Unknown                         | 1,846 (1.2)    | 355 (1.2)     | 1,511 (1.2)    |
| eGFR, ml/min/1.73m <sup>2</sup> | 84 ± 21        | 82 ± 22       | 85 ± 21        |
| Systolic BP, mm Hg              | 131 ± 13       | 130 ± 16      | 130 ± 13       |
| Diastolic BP, mm Hg             | 77 ± 8         | 76 ± 10       | 77 ± 8         |
| Heart failure                   | 5,194 (3.5)    | 1,092 (4.0)   | 4,102 (3.4)    |
| Coronary artery disease         | 13,327 (8.9)   | 2,991 (10.9)  | 10,336 (8.5)   |
| HTN only                        | 110,891 (74.1) | 6,031 (21.9)  | 104,860 (85.9) |
| DM only                         | 4,385 (2.9)    | 2,238 (8.1)   | 2,147 (1.8)    |
| HTN + DM                        | 34,278 (22.9)  | 19,279 (70.0) | 14,999 (12.3)  |

Note: Results presented as mean ± standard deviation or n (%)

<sup>1</sup>Other includes American Indian or Alaska Native, Asian, Native Hawaiian or Other Pacific Islander.

Abbreviations: BP = diastolic blood pressure; DM = diabetes mellitus; eGFR = estimated glomerular filtration rate; EHR = electronic health record; HTN = hypertension; NHANES = National Health And Nutrition Examination Survey.



**eTable 8. Albuminuria Prevalence, Testing, and Detection, using Optum® EHR-derived Prediction Model**

| Stratum    | N       | N tested (%)  | Tested, observed albuminuria | Untested, predicted albuminuria | Albuminuria prevalence in stratum (%) | Albuminuria detection rate (%) |
|------------|---------|---------------|------------------------------|---------------------------------|---------------------------------------|--------------------------------|
| Overall    | 192,108 | 33,629 (17.5) | 11,525                       | 38,109                          | 25.8                                  | 23.2                           |
| Male       | 86,517  | 16,683 (19.3) | 6,045                        | 18,352                          | 28.2                                  | 24.8                           |
| Female     | 105,591 | 16,946 (16)   | 5,480                        | 19,756                          | 23.9                                  | 21.7                           |
| Age 18-49  | 43,583  | 6,042 (13.9)  | 1,780                        | 7,227                           | 20.7                                  | 19.8                           |
| Age 50-64  | 69,262  | 12,700 (18.3) | 3,843                        | 11,782                          | 22.6                                  | 24.6                           |
| Age 65-74  | 42,941  | 8,659 (20.2)  | 3,054                        | 8,450                           | 26.8                                  | 26.5                           |
| Age 75+    | 36,322  | 6,228 (17.1)  | 2,848                        | 10,648                          | 37.2                                  | 21.1                           |
| Black      | 21,001  | 4,644 (22.1)  | 1,573                        | 4,030                           | 26.7                                  | 28.1                           |
| Hispanic   | 8,153   | 2,100 (25.8)  | 765                          | 1,630                           | 29.4                                  | 31.9                           |
| Other      | 10,299  | 2,084 (20.2)  | 780                          | 2,256                           | 29.5                                  | 25.7                           |
| White      | 152,655 | 24,801 (16.2) | 8,407                        | 30,191                          | 25.3                                  | 21.8                           |
| DM only    | 6,519   | 3,070 (47.1)  | 562                          | 1,033                           | 24.5                                  | 35.2                           |
| HTN only   | 141,601 | 7,219 (5.1)   | 1,742                        | 28,780                          | 21.6                                  | 5.7                            |
| DM + HTN   | 43,988  | 23,340 (53.1) | 9,221                        | 8,296                           | 39.8                                  | 52.6                           |
| eGFR 60+   | 163,606 | 27,283 (16.7) | 8,143                        | 28,234                          | 22.2                                  | 22.4                           |
| eGFR 45-59 | 18,709  | 3,982 (21.3)  | 1,844                        | 5,594                           | 39.8                                  | 24.8                           |
| eGFR 30-44 | 7,992   | 1,939 (24.3)  | 1,192                        | 3,334                           | 56.6                                  | 26.3                           |
| eGFR <30   | 1,801   | 425 (23.6)    | 346                          | 945                             | 71.7                                  | 26.8                           |

Albuminuria prevalence within each stratum was computed as  $([n \text{ tested, observed albuminuria}] + [n \text{ untested, predicted albuminuria}]) / (N \text{ within stratum})$ . Albuminuria detection rate is the percent of all albuminuria within a stratum that has detected by UACR testing.

Abbreviations: DM = diabetes mellitus; eGFR = estimated glomerular filtration rate; EHR = electronic health record; HTN = hypertension; UACR = urine albumin/creatinine ratio.

**eFigure 1. Consort Diagram – Optum® EHR Study Population**

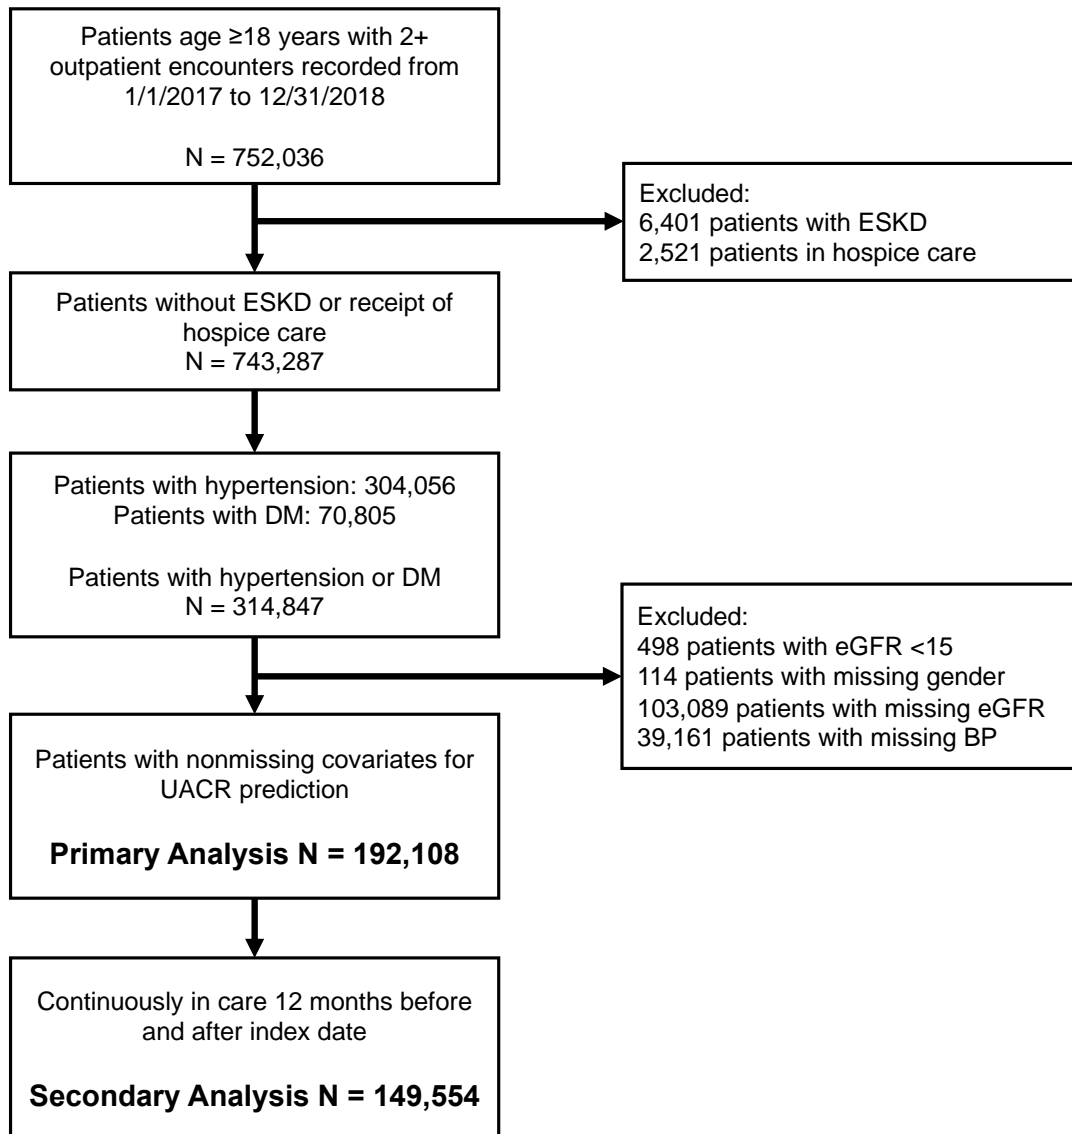

Abbreviations: BP = blood pressure; DM = diabetes mellitus; eGFR = estimated glomerular filtration rate; EHR = electronic health record; ESKD = end-stage kidney disease; UACR = urine albumin/creatinine ratio.

**eFigure 2. Consort Diagram – NHANES Study Population**

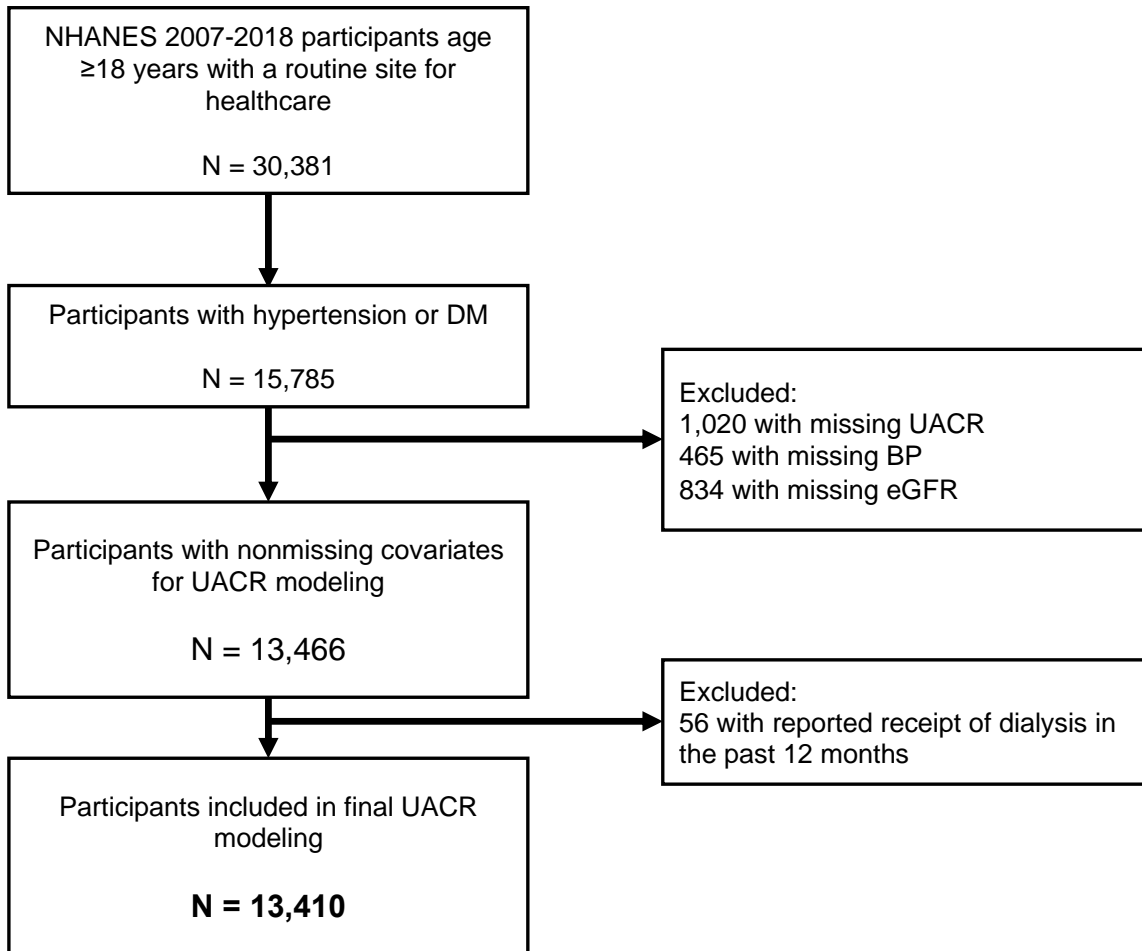

Abbreviations: BP = blood pressure; DM = diabetes mellitus; eGFR = estimated glomerular filtration rate; NHANES = National Health And Nutrition Examination Survey; UACR = urine albumin/creatinine ratio.

**eFigure 3. Calibration Plots for Albuminuria Prediction Model**

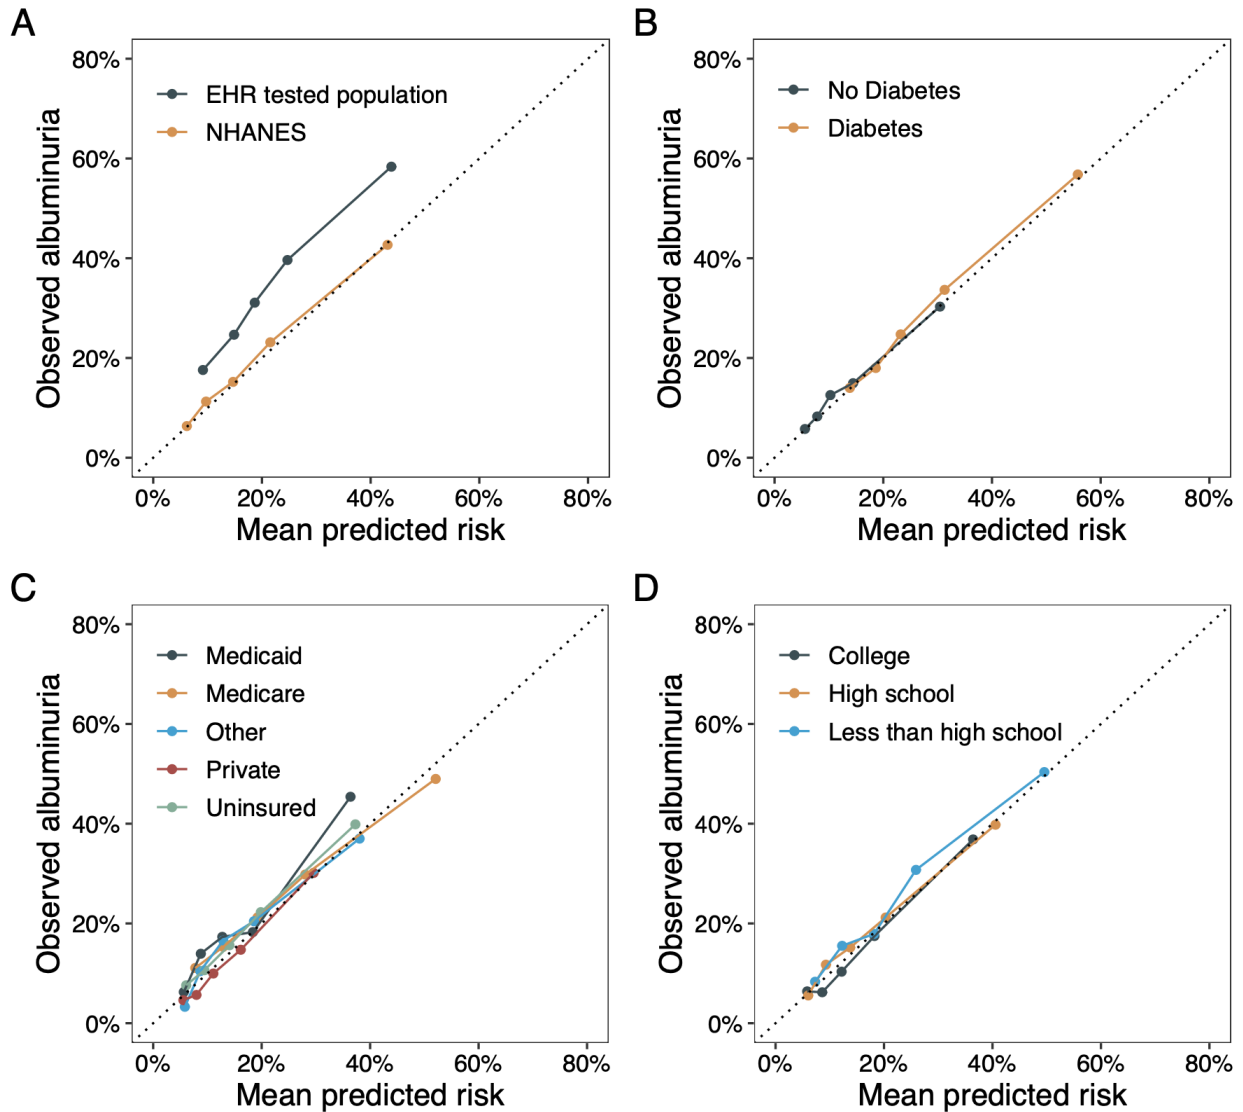

Panel A shows calibration of the albuminuria risk model internally in NHANES and externally in Optum EHR data. Panels B-D: Model calibration in NHANES was assessed stratified by diabetes status, insurance type, and education level respectively, as these subpopulations may potentially have different albuminuria testing rates. The diagonal line denotes perfect agreement between predicted and observed risk. Abbreviations: EHR = electronic health record; NHANES = National Health And Nutrition Examination Survey.

**eFigure 4. Estimated Albuminuria Prevalence and Proportion Detected by Diabetes Status (Optum® EHR; N = 192,108)**

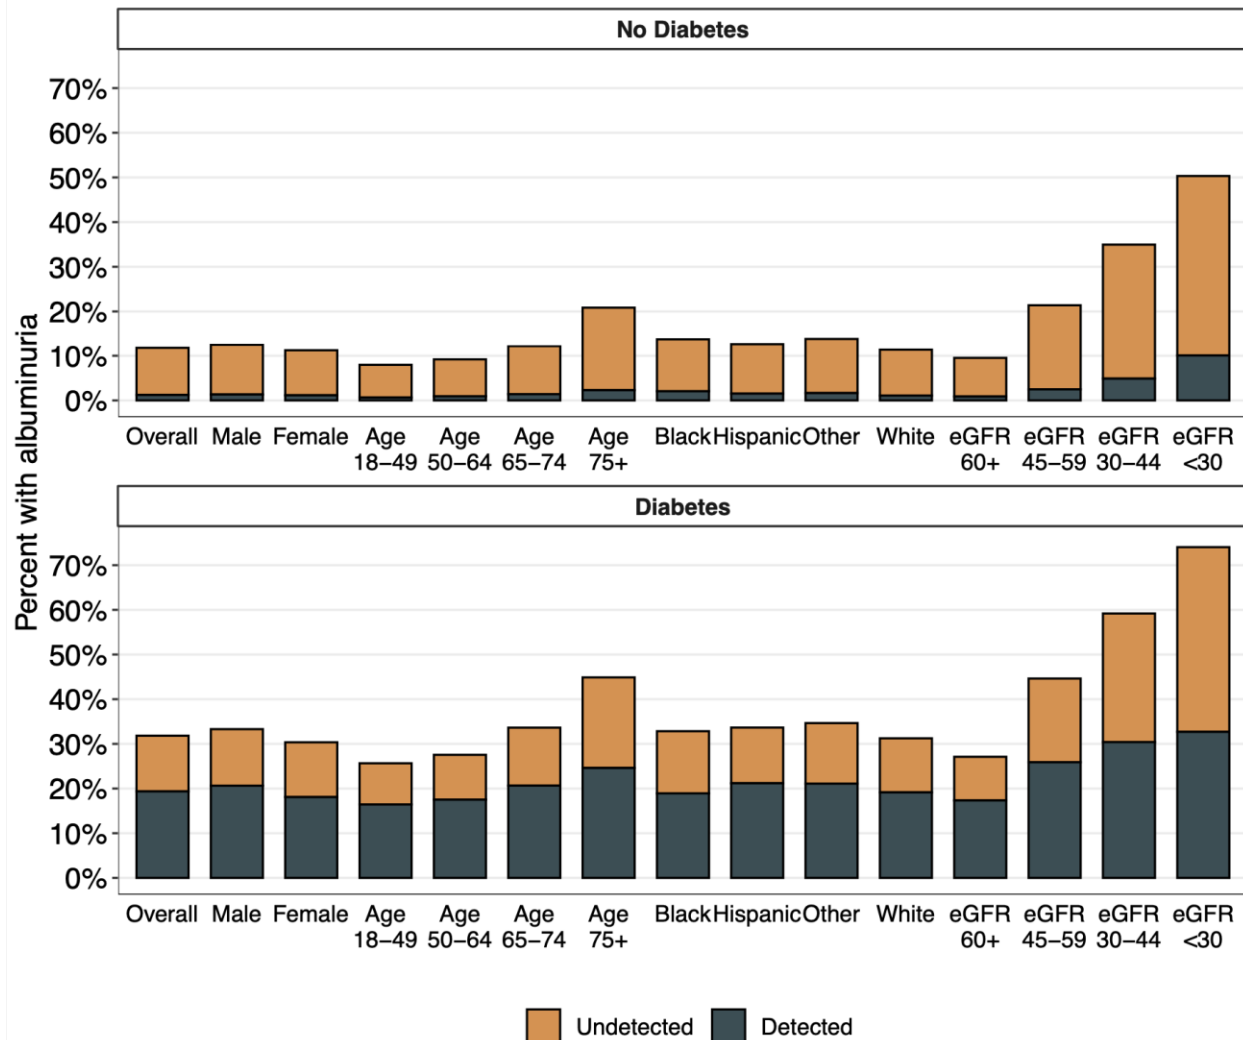

Detected albuminuria prevalence refers to tested patients having albuminuria  $\geq 30$  mg/g. Undetected albuminuria prevalence is the estimated prevalence of albuminuria  $\geq 30$  mg/g based on patient characteristics among the untested population. Abbreviations: eGFR = estimated glomerular filtration rate; EHR = electronic health record.

**eFigure 5. Calibration Plot for Optum<sup>®</sup> Electronic Health Record Derived Albuminuria Prediction Model**

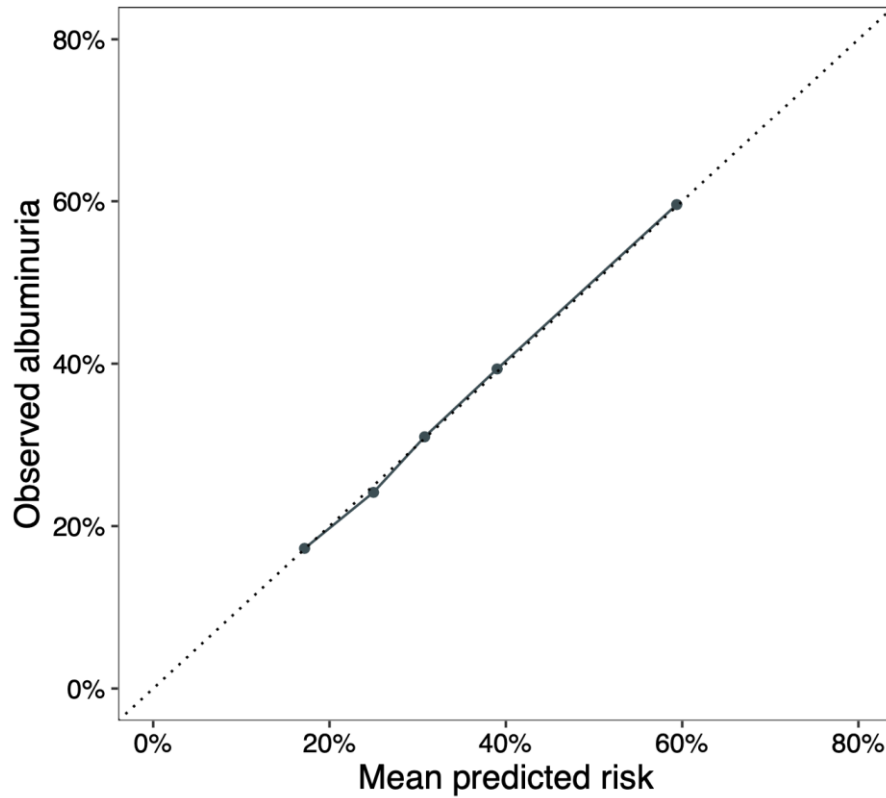

The diagonal line denotes perfect agreement between predicted and observed risk. The c-statistic for this model was 0.687 (95% confidence interval; 0.681, 0.693).
