# Supplementary material for: Estimated Prevalence and Testing for Albuminuria in US Adults at Risk for Chronic Kidney Disease
Source: PubMed Central journal article supplement — JAMA Netw Open. 2023 Jul 27;6(7):e2326230. doi: 10.1001/jamanetworkopen.2023.26230 (PMC10375308; doi:10.1001/jamanetworkopen.2023.26230), 2023-07-27
Supplement: jamanetwopen-e2326230-s002.pdf [file jamanetwopen-e2326230-s002.pdf]

## Data Sharing Statement

Chu. Estimated Prevalence and Testing for Albuminuria in US Adults at Risk for Chronic Kidney Disease. *JAMA Netw Open*. Published July 27, 2023.

doi:10.1001/jamanetworkopen.2023.26230

### Data

**Data available:** No

### Additional Information

**Explanation for why data not available:** Data used for this study were obtained from Optum under a data use agreement, and may not be shared publicly.
